# Supplementary material for: Fluorescent bioinspired albumin/polydopamine nanoparticles and their interactions with Escherichia coli cells
Source: publisher site journal article supplement (doi:10.3762/bjnano.14.100), 2023-12-22
Supplement: Additional file 1 [file 2190-4286-14-100-S1.pdf]

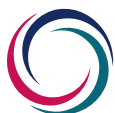

## Supporting Information

for

### **Fluorescent bioinspired albumin/polydopamine nanoparticles and their interactions with *Escherichia coli* cells**

Eloïse Equy, Jordana Hirtzel, Sophie Hellé, Béatrice Heurtault, Eric Mathieu, Morgane Rabineau, Vincent Ball and Lydie Ploux

*Beilstein J. Nanotechnol.* **2023**, *14*, 1208–1224. [doi:10.3762/bjnano.14.100](https://doi.org/10.3762/bjnano.14.100)

## Additional tables and figures

**Table S1:** Mean hydrodynamic diameter and polydispersity index (PDI) of BSA/PDA NPs in Tris buffer 50 mM (without dialysis and freeze-drying).

|                    | Ratio<br>BSA/DA | Mean diameter<br>in intensity (nm) | Mean diameter<br>in number (nm) | PDI         |
|--------------------|-----------------|------------------------------------|---------------------------------|-------------|
| BSA/PDA-NPs        | 0.25            | 83 ± 22                            | 66 ± 16                         | 0.21 ± 0.01 |
|                    | 1               | 32 ± 7                             | 26 ± 6                          | 0.32 ± 0.06 |
|                    | 3               | 18 ± 5                             | 14 ± 3                          | 0.27 ± 0.04 |
|                    | 6               | 15 ± 4                             | 11 ± 3                          | 0.27 ± 0.04 |
|                    | 10              | 15 ± 7                             | 9 ± 3                           | 0.27 ± 0.04 |
| Ox-BSA/PDA-NPs     | 10              | 15 ± 4                             | 11 ± 3                          | ND          |
| RhBITC-BSA/PDA-NPs | 10              | 28 ± 6                             | 24 ± 3                          | 0.57 ± 0.06 |
| FITC BSA/PDA-NPs   | 10              | 17 ± 5                             | 12 ± 3                          | 0.19 ± 0.01 |

**Table S2:** Concentration, number of NPs per mL, and reaction yield of the as-prepared pristine BSA/PDA NPs solutions.

| Ratio BSA/DA | Concentration (mg/mL) | Number of NPs /mL  | Reaction Yield (%) |
|--------------|-----------------------|--------------------|--------------------|
| 0.25         | 2                     | $5 \times 10^{15}$ | 85                 |
| 1            | 2                     | $8 \times 10^{16}$ | 50                 |
| 3            | 3                     | $2 \times 10^{14}$ | 85                 |
| 6            | 9                     | $3 \times 10^{18}$ | 63                 |
| 10           | 19                    | $4 \times 10^{15}$ | 85                 |

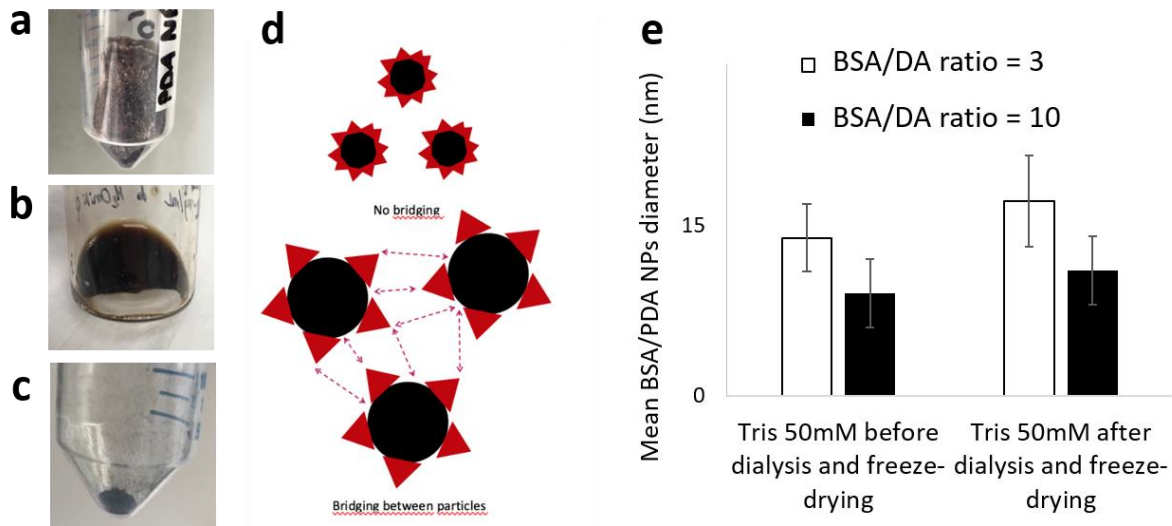

**Figure S1:** BSA/PDA NPs after freeze-drying. Pictures of (a) a foam obtained after freeze-drying of a BSA/PDA NPs suspension synthesized with a BSA/DA ratio of 3. (b) PDA/BSA NPs re-dissolved foam into Milli-Q® water (10mg/mL). (c) PDA/BSA-NPs ratio of 0.25 dehydrated powder. (d) Schematic of bridging between PDA/BSA-NPs. (e) PDA/BSA-NPs size variation due to dialysis and freeze-drying.

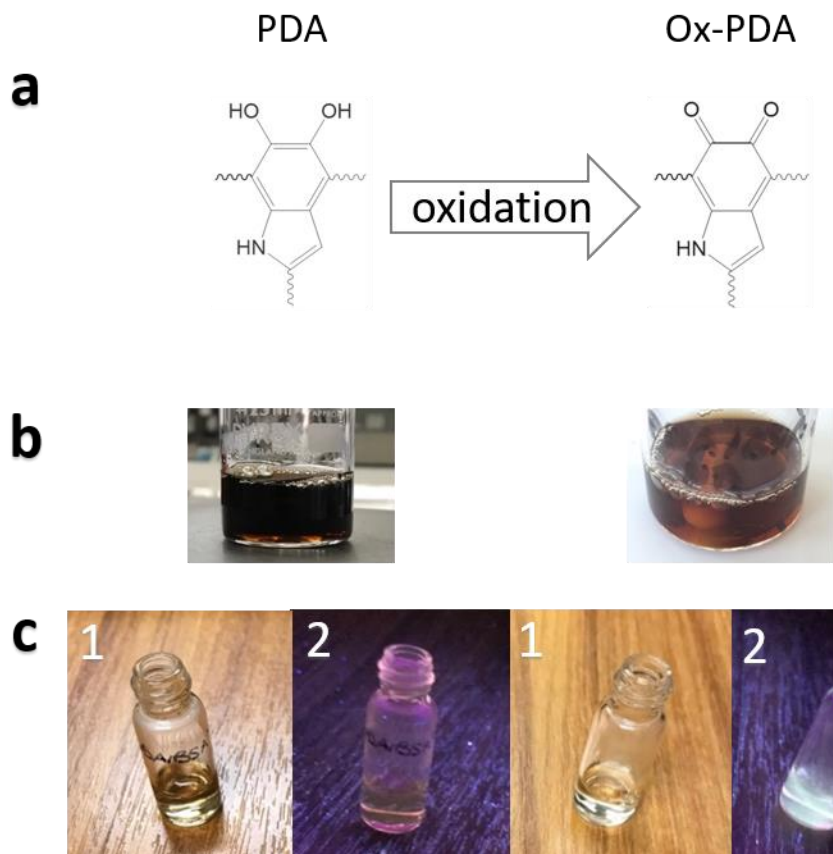

**Figure S2:** Oxidation of pristine BSA/PDA NPs providing fluorescent Ox-BSA/PDA NPs. (a) Reaction scheme of PDA (inspired from Ma et al. [1]). (b) Pictures of PDA/BSA-NPs suspensions after 1 h (left) or 24 h (right) of reaction with H<sub>2</sub>O. (c) Pictures of PDA/BSA-NPs suspensions before (left) and after (right) oxidation (1) under natural light and (2) under UV light (365 nm).

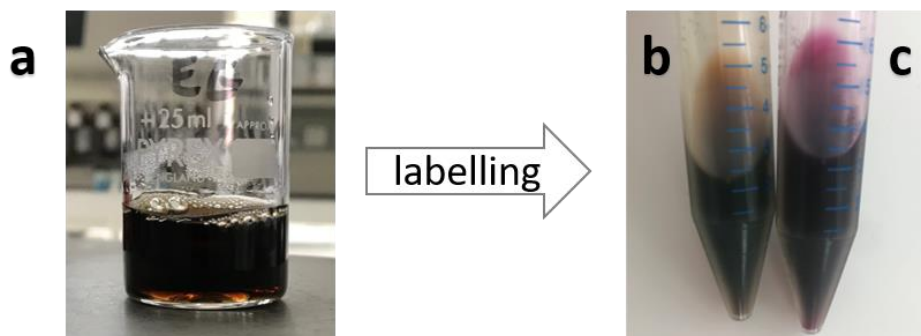

**Figure S3:** Pictures of FITC- and RhBITC-BSA/PDA NPs suspensions after dialysis with a 8–10 kDa cut-off membrane. (a) FITC-BSA/PDA NPs. (b) RhBITC-BSA/PDA NPs (c).

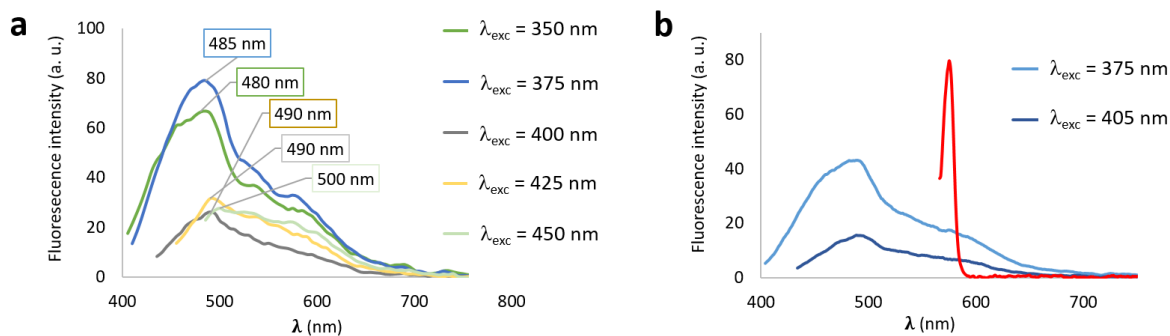

**Figure S4:** Absorption and emission spectra of Ox-PDA/BSA-NPs. (a) Emission spectra according to various excitation wavelengths ( $\lambda_{\text{exc}}$ ) (PMT voltage at 1000 V); wavelengths corresponding to fluorescence intensity maxima are indicated in labels; spectra were smoothed by moving average method on 3 points. (b) Emission spectra of a mixture of Ox-PDA/BSA-NPs (3 mg/mL) and RhBITC (0.06 mg/mL) (95/5) under different excitation wavelengths ( $\lambda_{\text{exc}}$ ) (PMT voltage at 900 V); spectra were smoothed by centered moving average method on 9, 9 and 3 points, respectively.

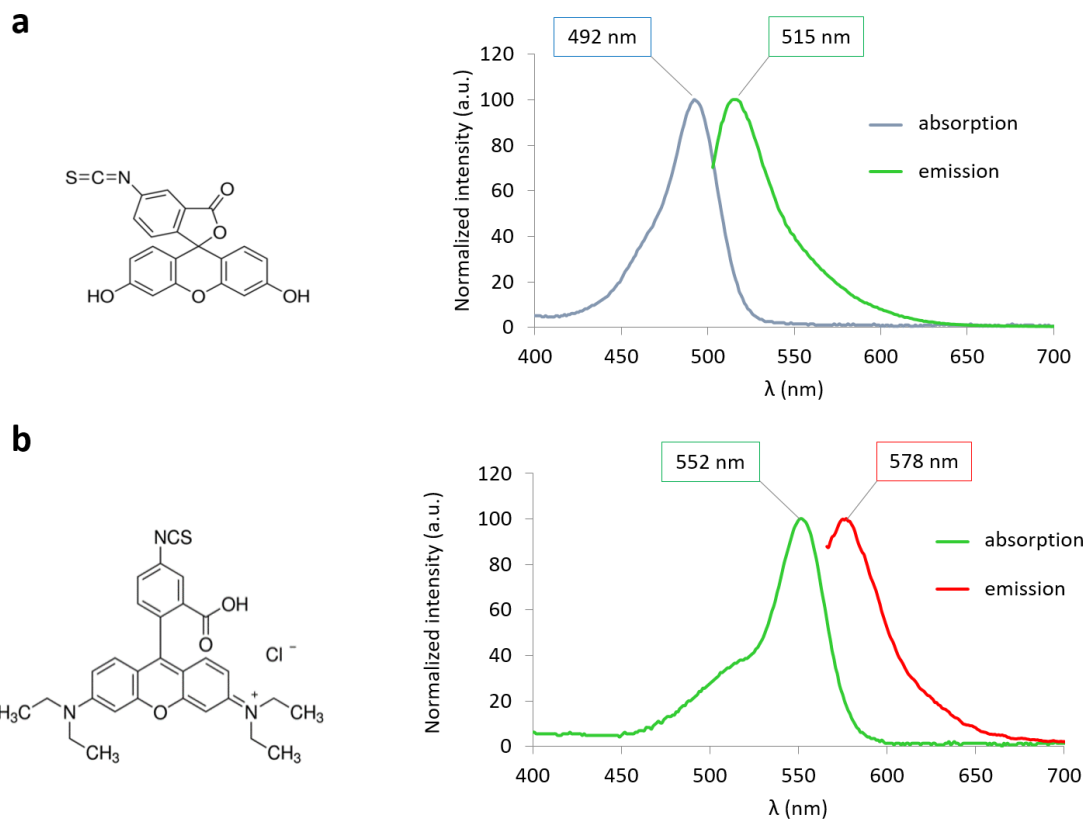

**Figure S5:** Absorption and emission spectra of free FITC and RhBITC. (a) Structure and normalized absorption and emission spectra of free FITC (164  $\mu\text{M}$ ) under excitation wavelength  $\lambda_{\text{exc}}$  of 488 nm. (b) Structure and normalized absorption and emission spectra of free RhBITC (373  $\mu\text{M}$ ) under excitation wavelength  $\lambda_{\text{exc}}$  of 550 nm. Spectra were smoothed by centered moving average method on 3 points.



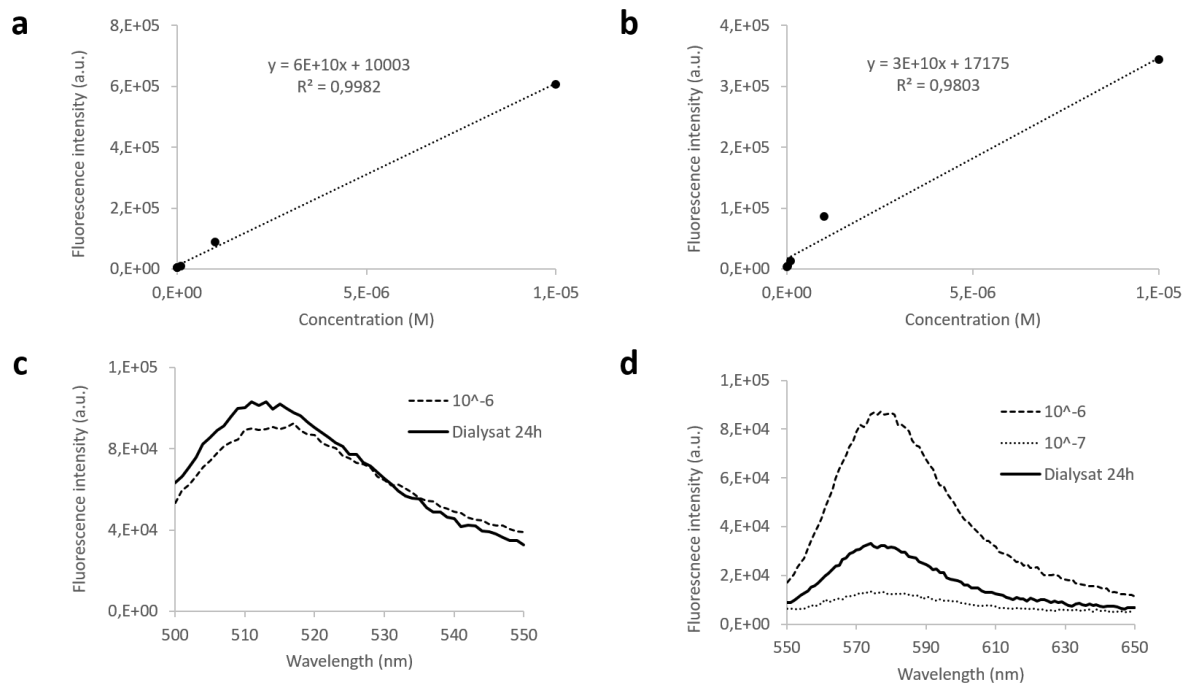

**Figure S6:** Estimation of the fraction of bound dye released from FITC-BSA/PDA NPs and RhBITC-BSA/PDA NPs after 4 months. (a), (b) The relationships between the fluorescence intensity and dye concentration were established for both FITC (a) and RhBITC (b) dyes. (c), (d) Dialysis was conducted with labelled NPs against 2 L of Milli-Q<sup>®</sup> water using a Spectra/Por<sup>®</sup> dialysis membrane with a molecular weight cut-off of 12–14 kDa. Based on the dye concentrations estimated to initially bind to NPs (164  $\mu$ M of FITC and 373  $\mu$ M of RhBITC), less than 1 % of dye (1.5  $\mu$ M -0.9%- for FITC and 0.5  $\mu$ M -0.1%- of RhBITC) was estimated to release from 4-months old labelled NPs.

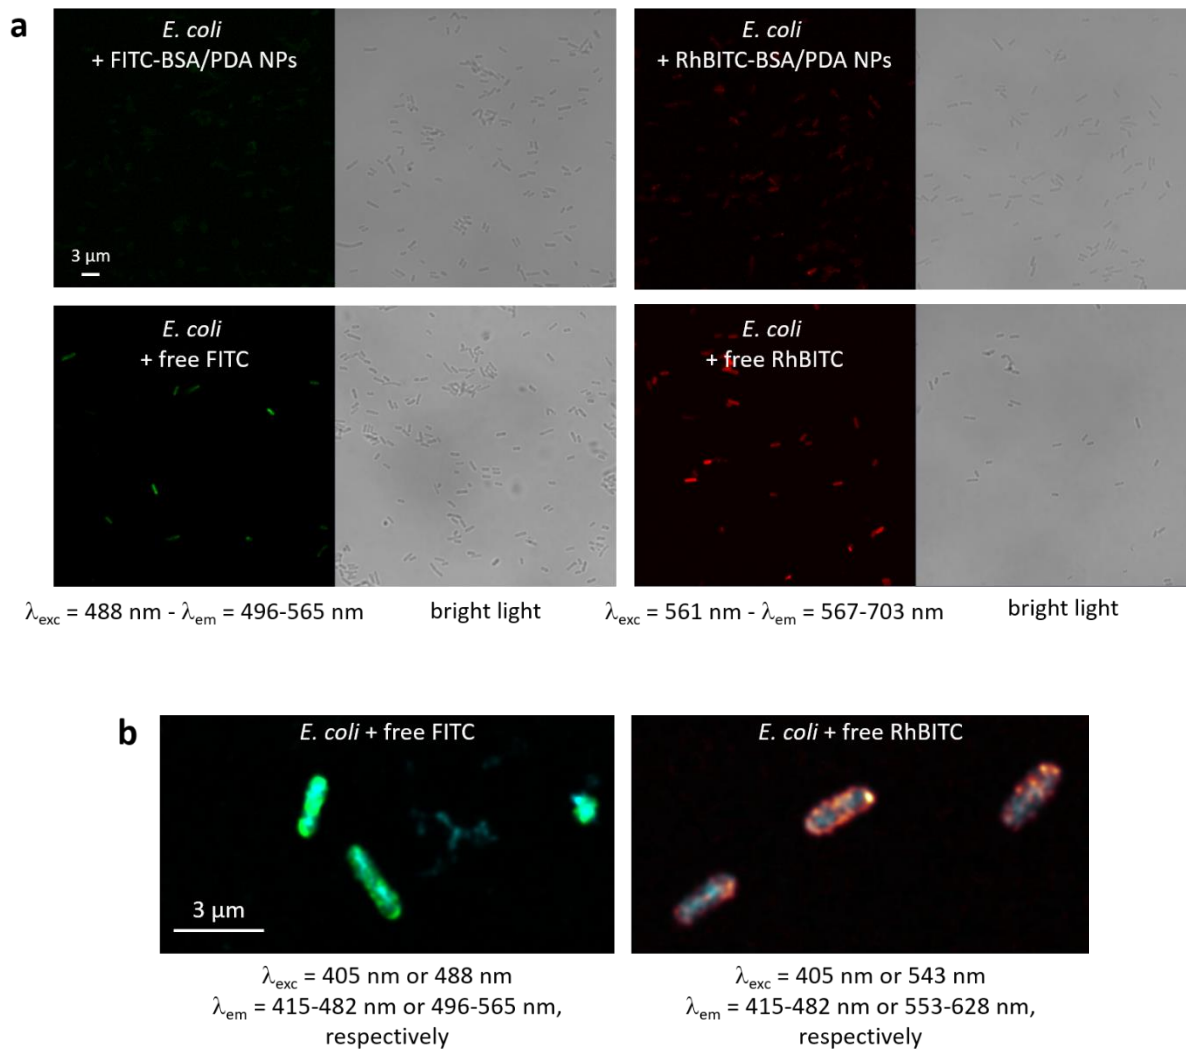

**Figure S7:** Micrographs of *E. coli* cells cultivated (a) with FITC-BSA/PDA NPs, RhBITC-BSA/PDA NPs, free FITC or free RhBITC and observed with standard CLSM (LSM710, Zeiss, Oberkochen, Germany), or (b) with free FITC or free RhBITC and observed with high-resolution CLSM (Stellaris 5, Leica Biosystems, Wetzlar, Germany).

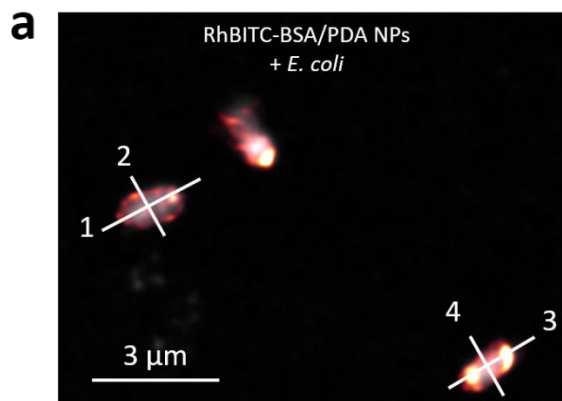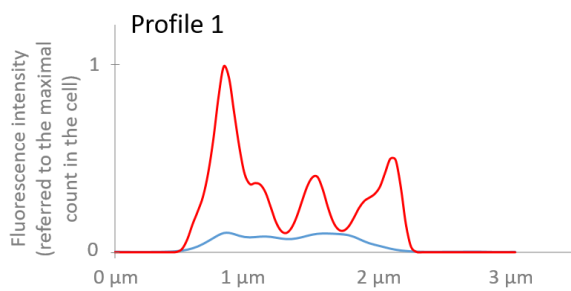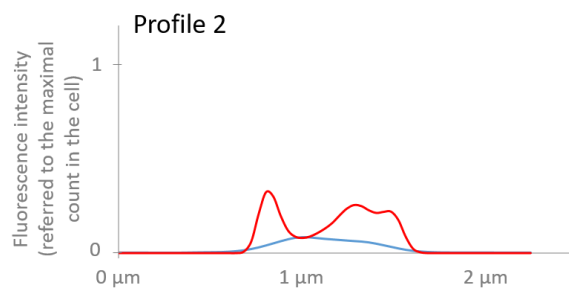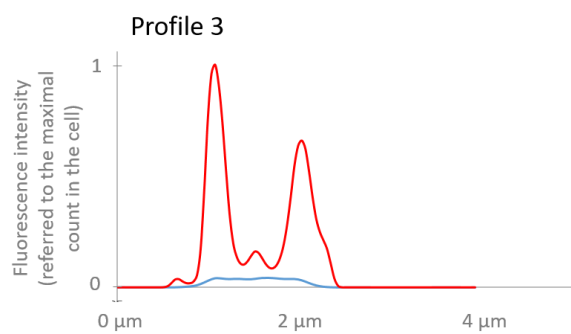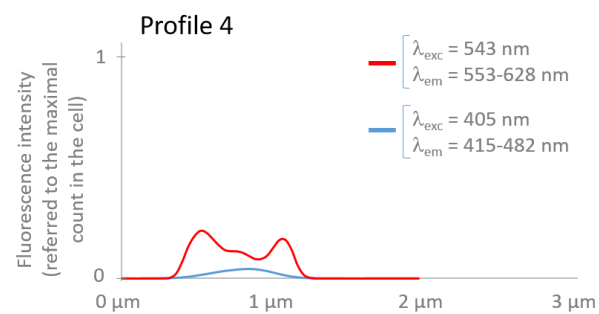

**b**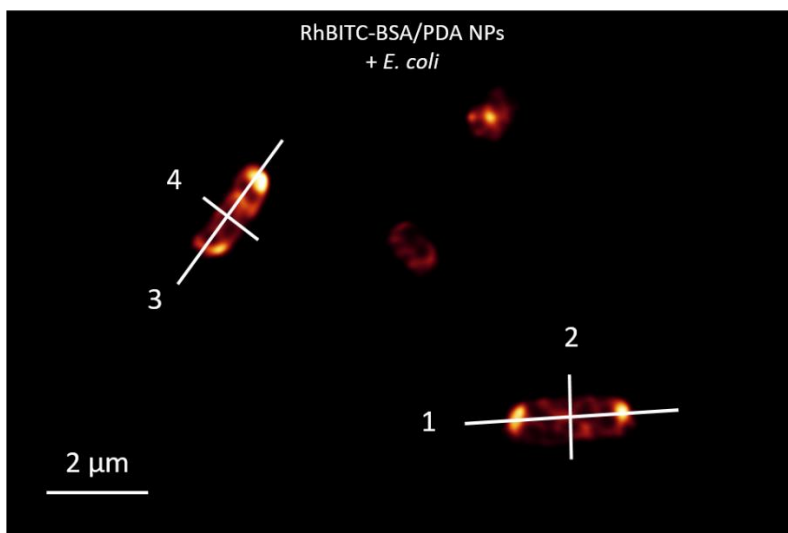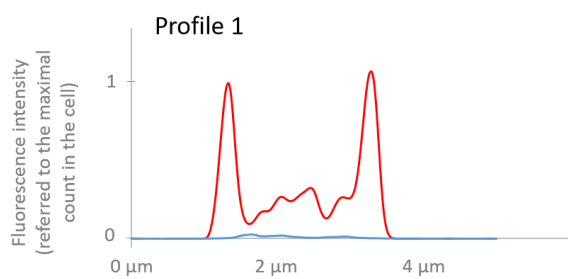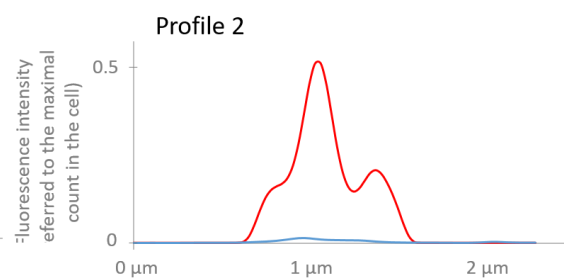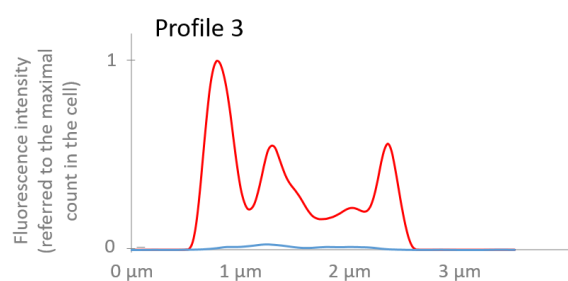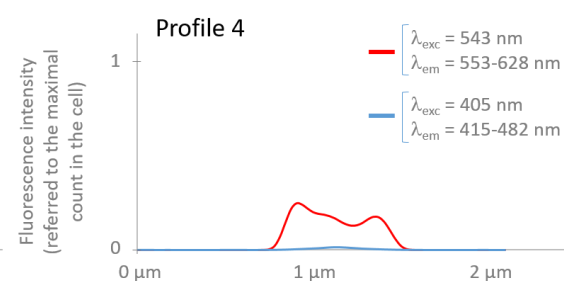

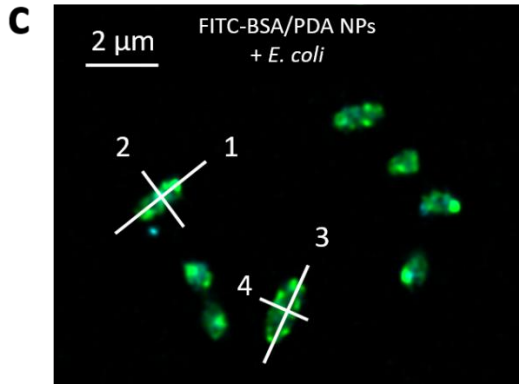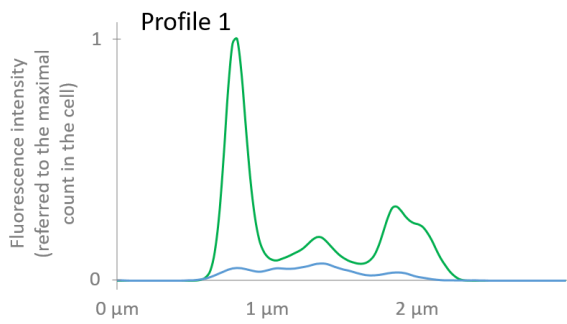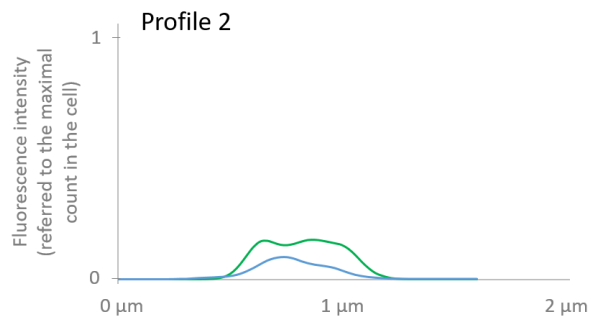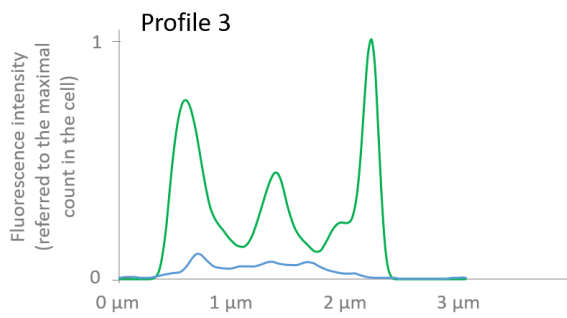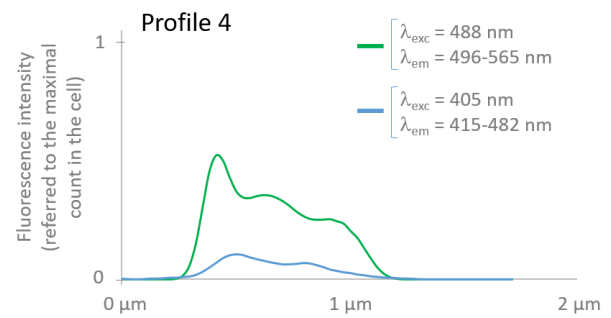

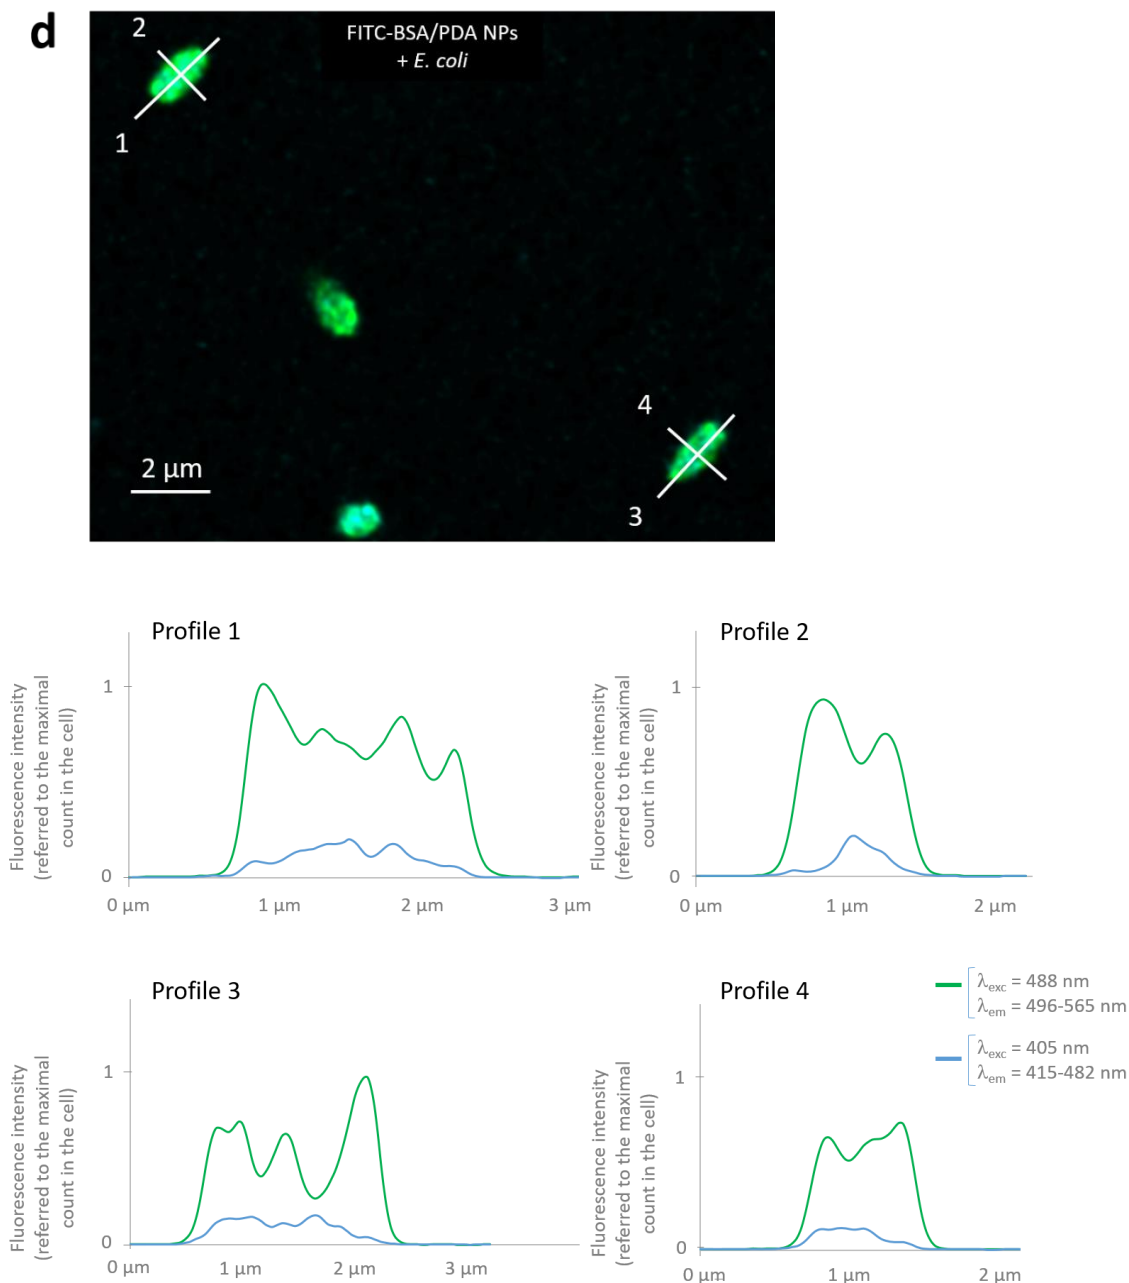

**Figure S8:** Typical profiles and patterns observed in micrographs of *E. coli* cells cultivated with RhBITC- or FITC-BSA/PDA NPs observed by high-resolution Stellaris 5 CLSM (Leica Biosystems, Wetzlar, Germany): (a) and (b) Two supplementary, typical examples of bacterial cells cultivated with RhBITC-BSA/PDA NPs ( $\lambda_{\text{exc}} = 405 \text{ nm}$  and  $543 \text{ nm}$ ;  $\lambda_{\text{em}} = 415\text{--}482 \text{ nm}$  and  $553\text{--}628 \text{ nm}$ , respectively); (c) and (d) Two typical examples of bacterial cells cultivated with FITC-BSA/PDA NPs ( $\lambda_{\text{exc}} = 405 \text{ nm}$  and  $488 \text{ nm}$ ;  $\lambda_{\text{em}} = 415\text{--}482 \text{ nm}$  and  $496\text{--}565 \text{ nm}$ , respectively).

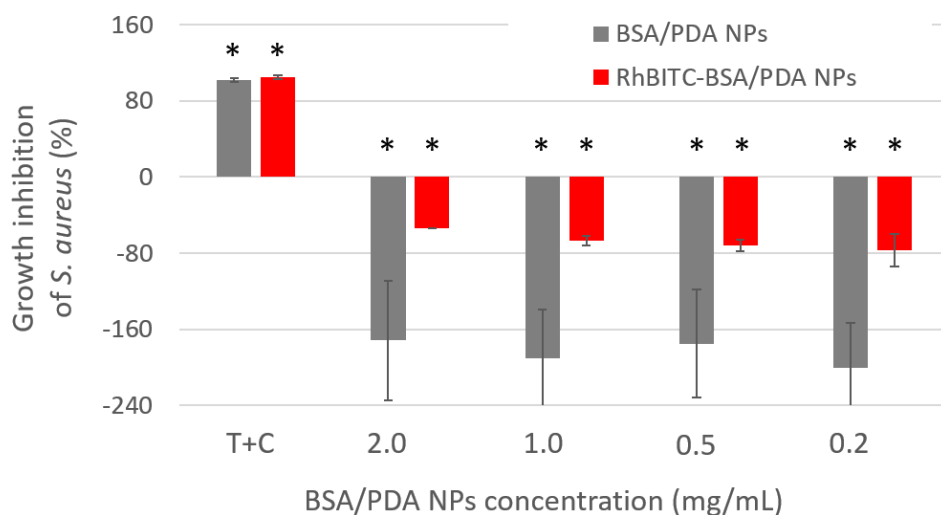

**Figure S9:** Growth inhibition of *S. aureus* populations with pristine BSA/PDA NPs and RhBITC-BSA/PDA NPs from 0.2 to 2 mg/mL concentration or with antibiotics (solution of 10  $\mu$ g/mL tetracycline and 0.1  $\mu$ g/mL cefotaxime) (“T+C”; positive control) compared to *S. aureus* culture without NPs. \*\*: significant differences to *S. aureus* culture without NPs ( $p$ -value < 0.001).

## References

1. Ma, B.; Liu, F.; Zhang, S.; Duan, J.; Kong, Y.; Li, Z.; Tang, D.; Wang, W.; Ge, S.; Tang, W.; Liu, H. *Journal of Materials Chemistry B* **2018**, 6 (40), 6459-6467. doi:10.1039/C8TB01930D
